# Supplementary material
Source: publisher figshare collection journal article supplement (https://gsajournals.figshare.com/articles/dataset/_/11536971)

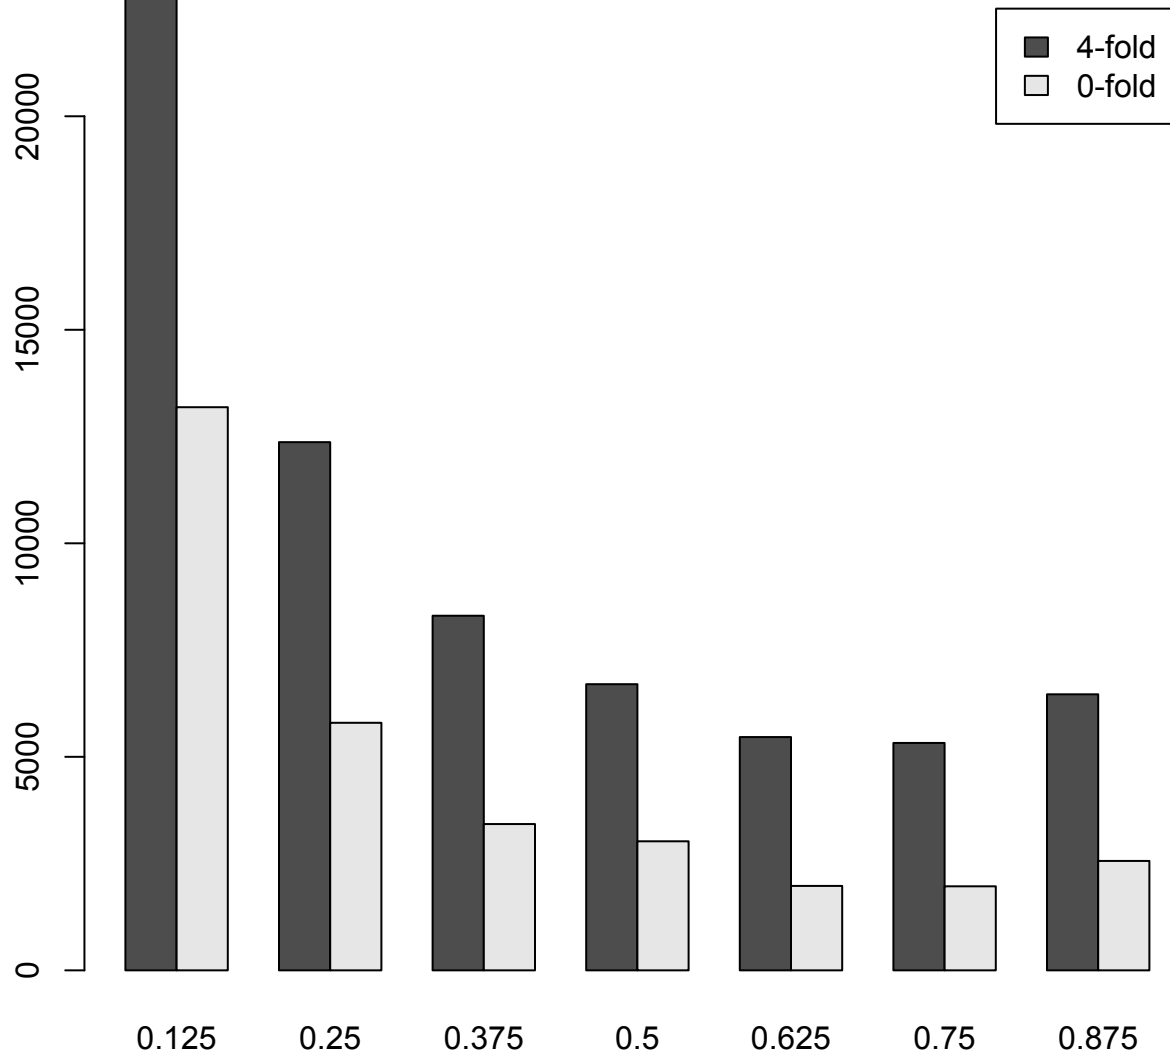

Supplement: Supplementary file 1 [file 1]

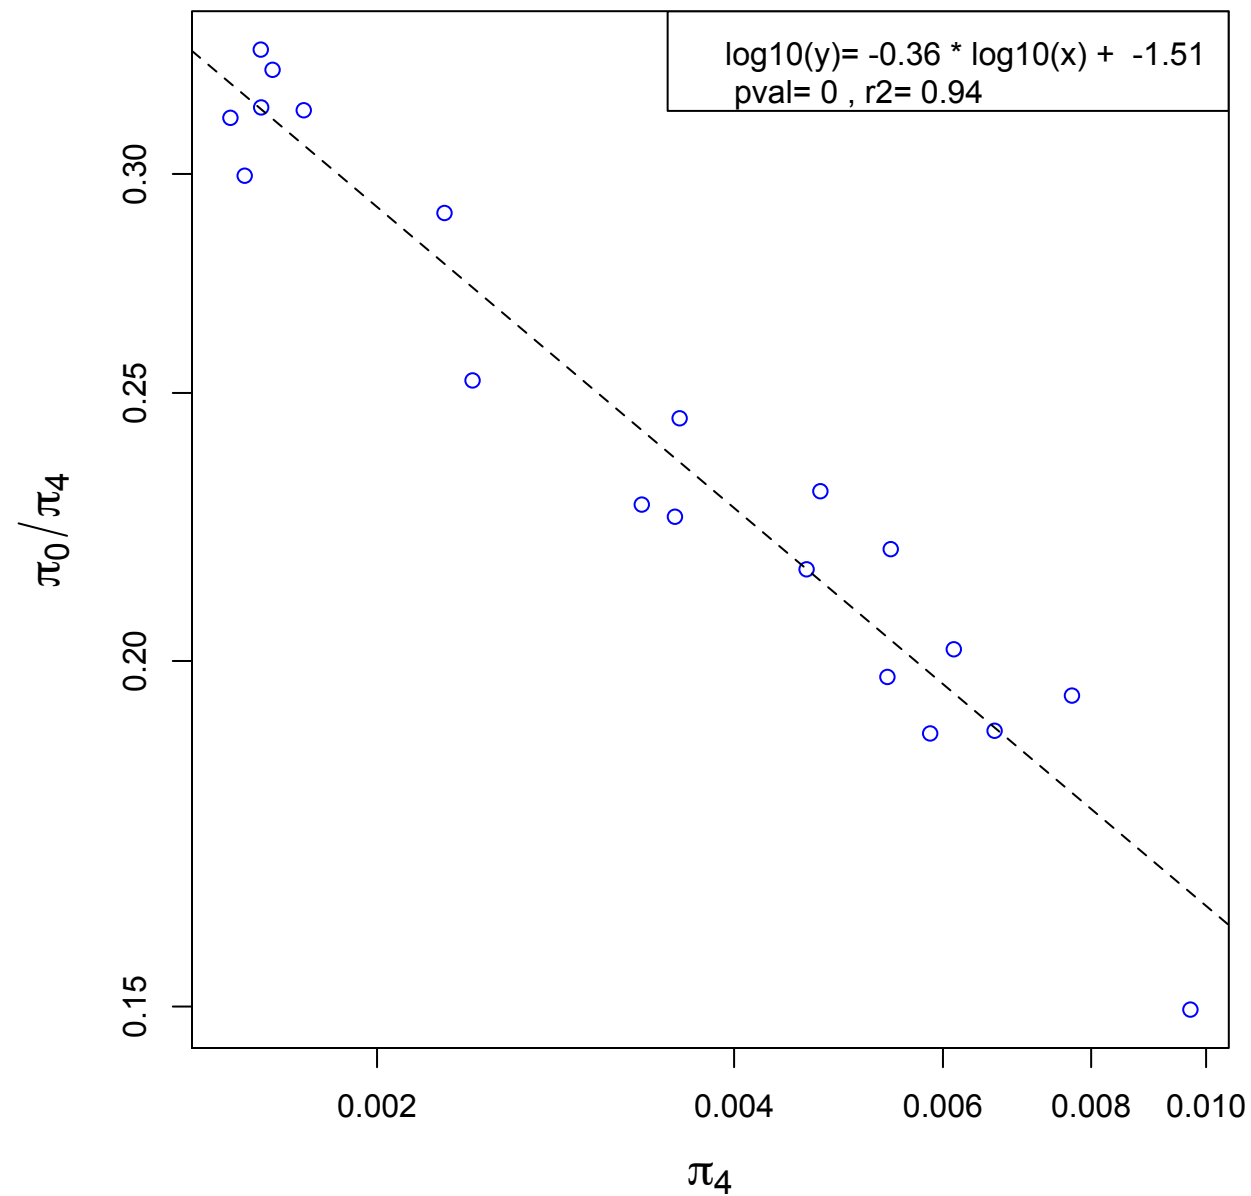

Supplement: Supplementary file 2 [file 1]

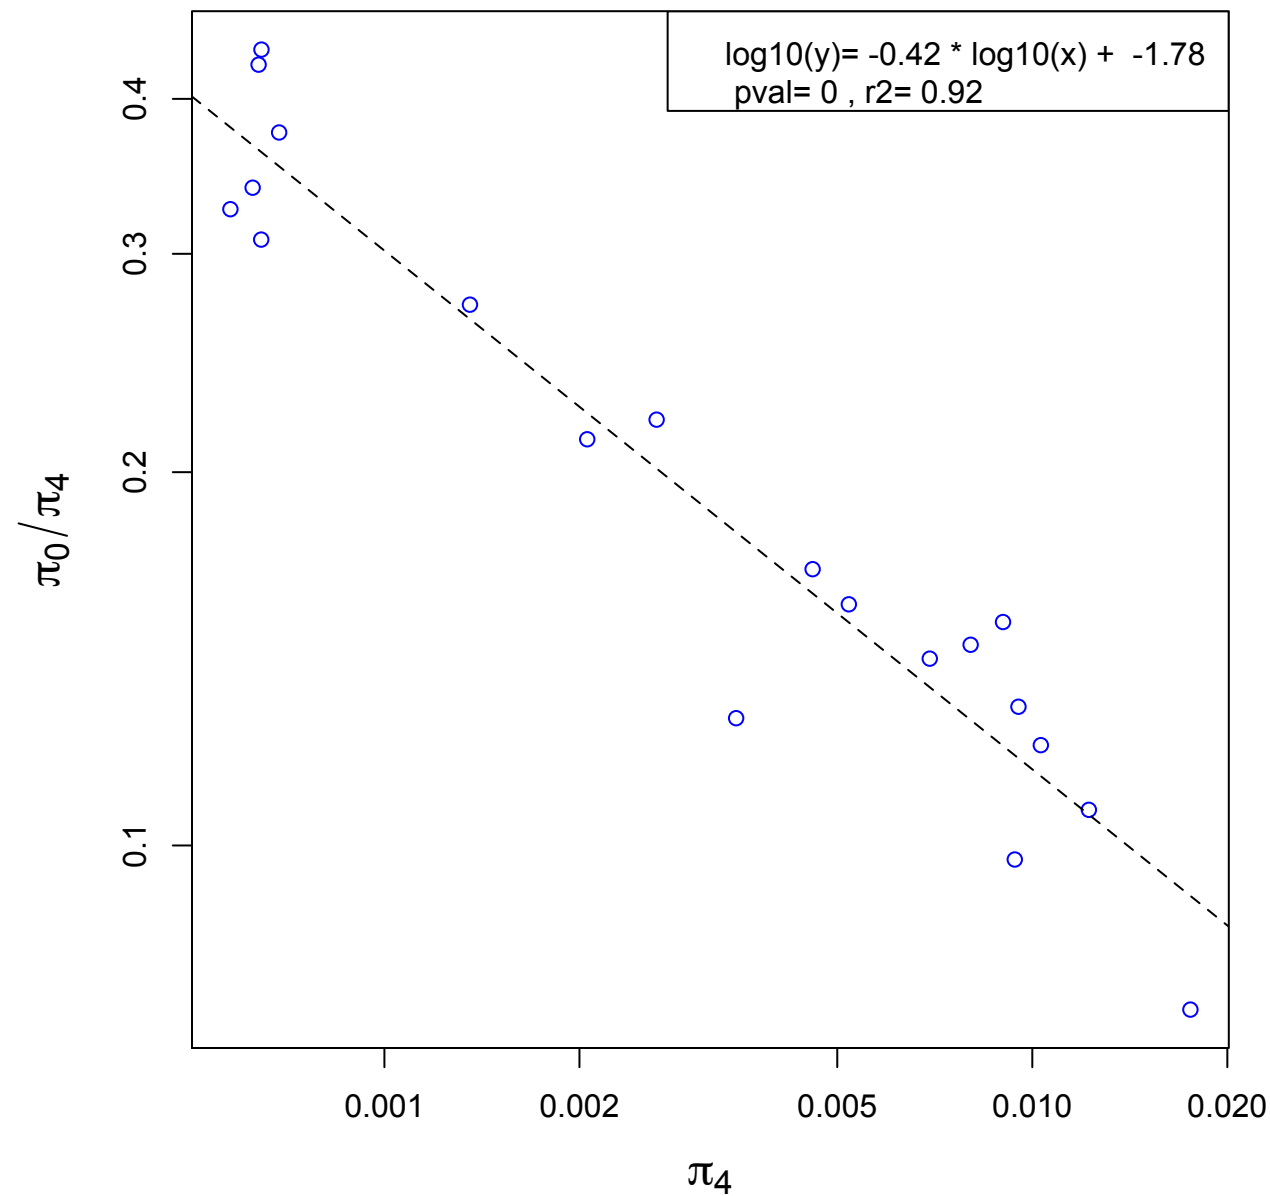

Supplement: Supplementary file 3 [file 1]

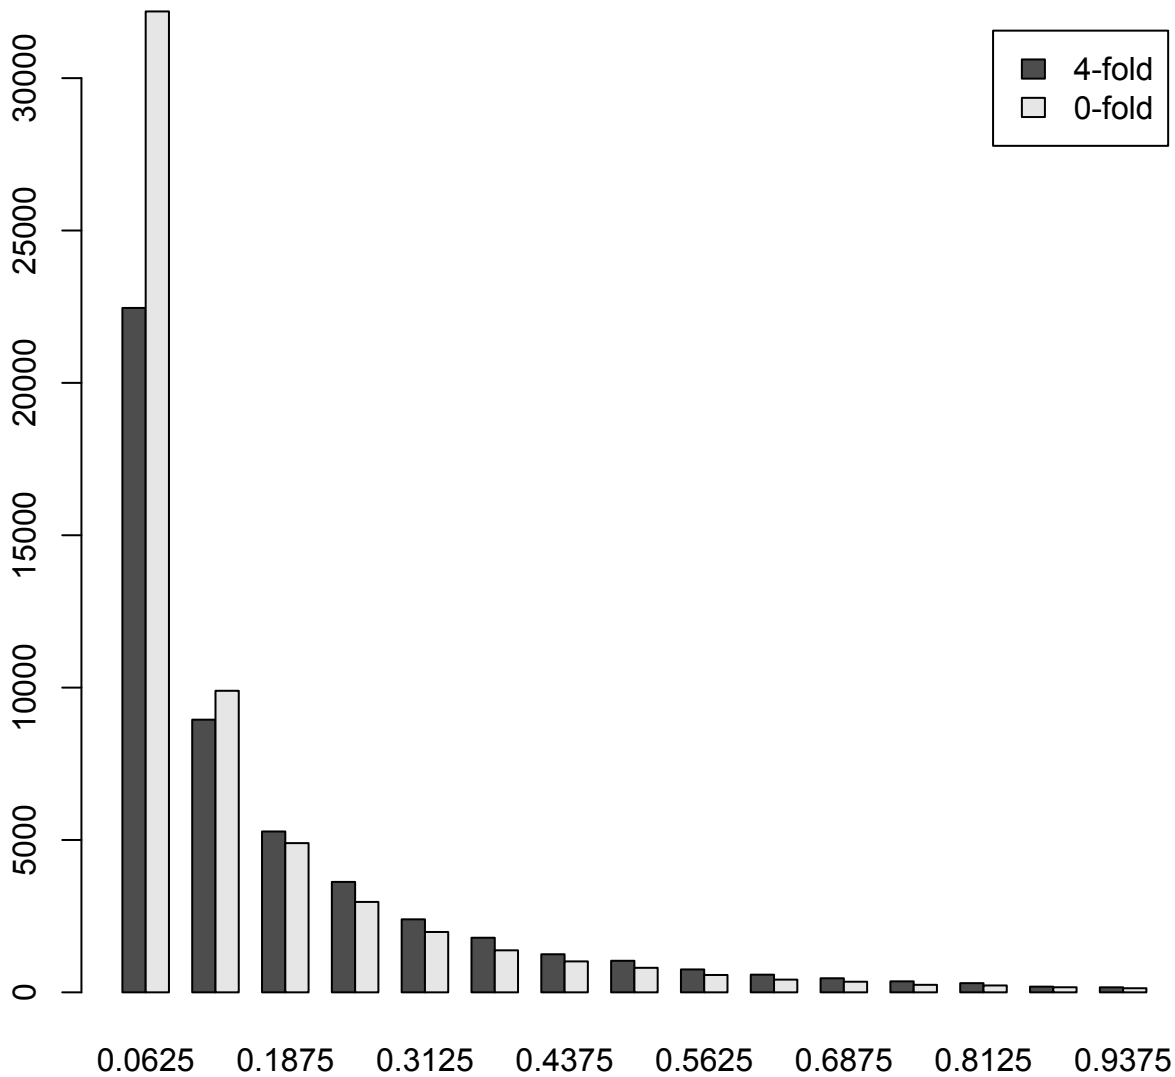

Supplement: Supplementary file 4 [file 1]

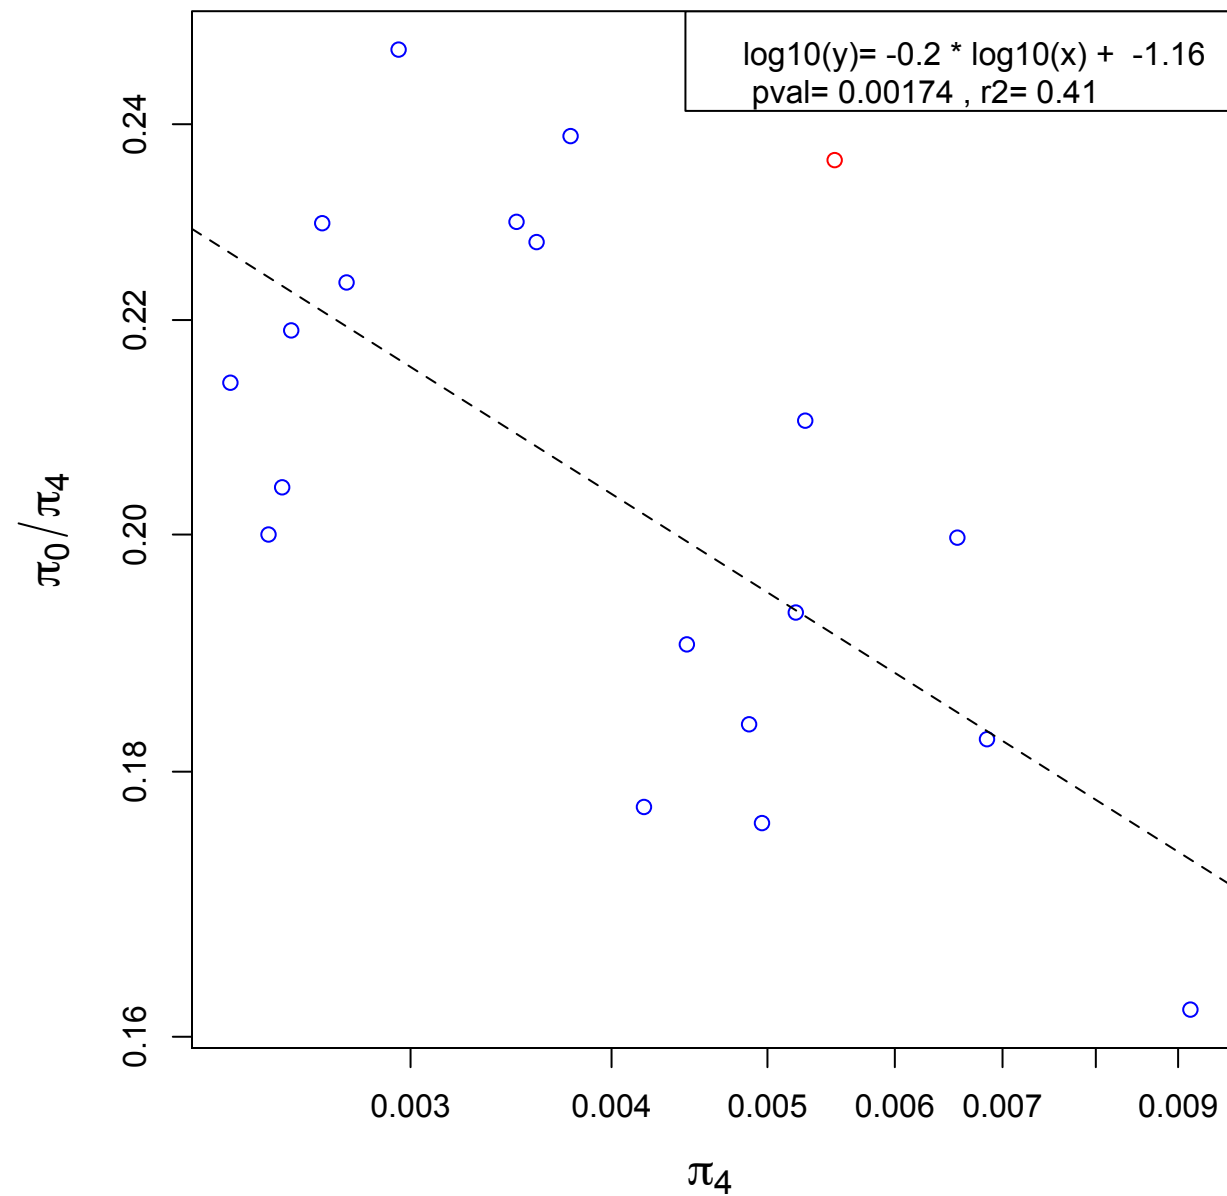

Supplement: Supplementary file 5 [file 1]

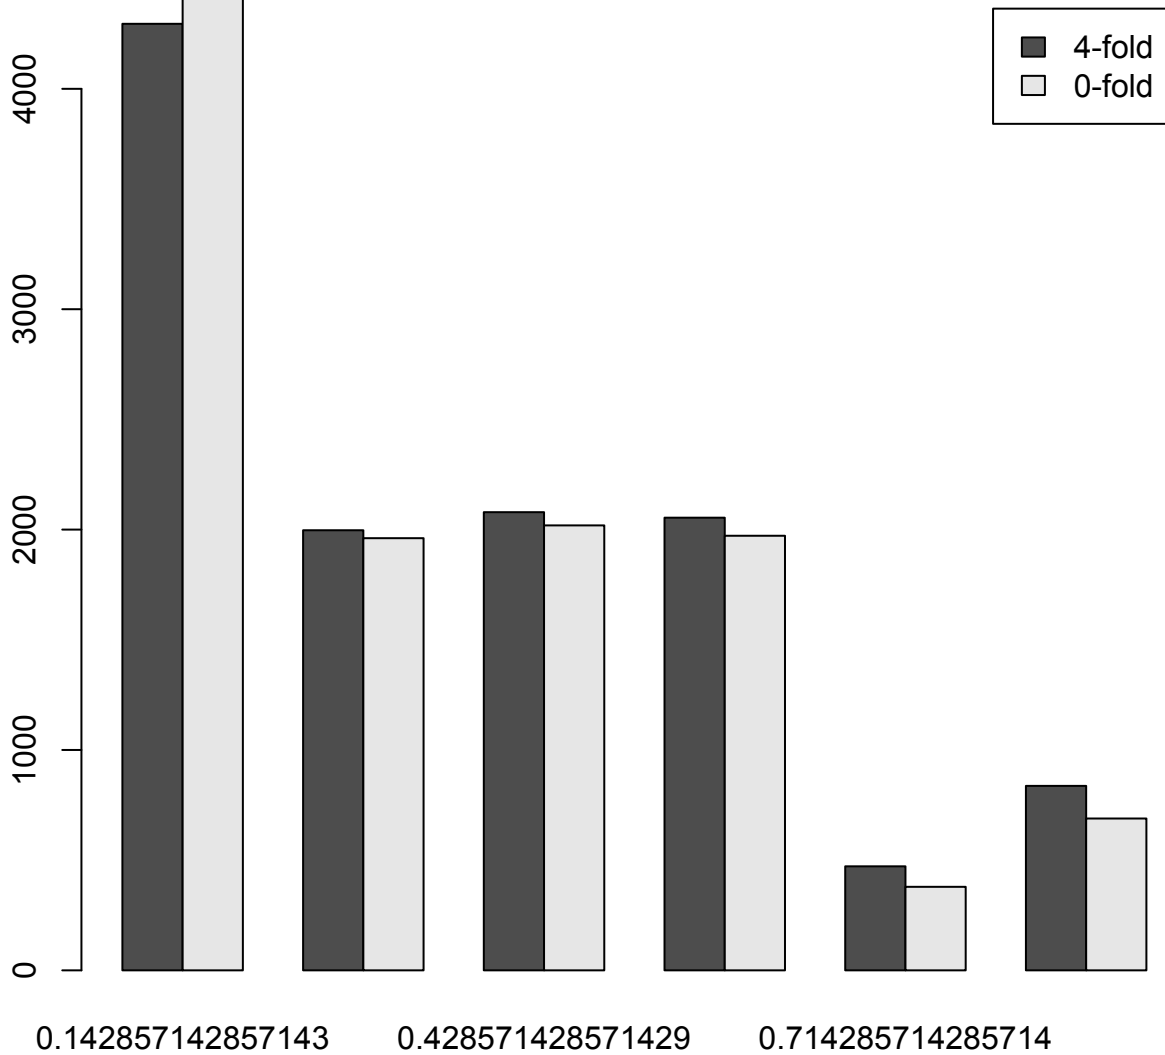

Supplement: Supplementary file 6 [file 1]

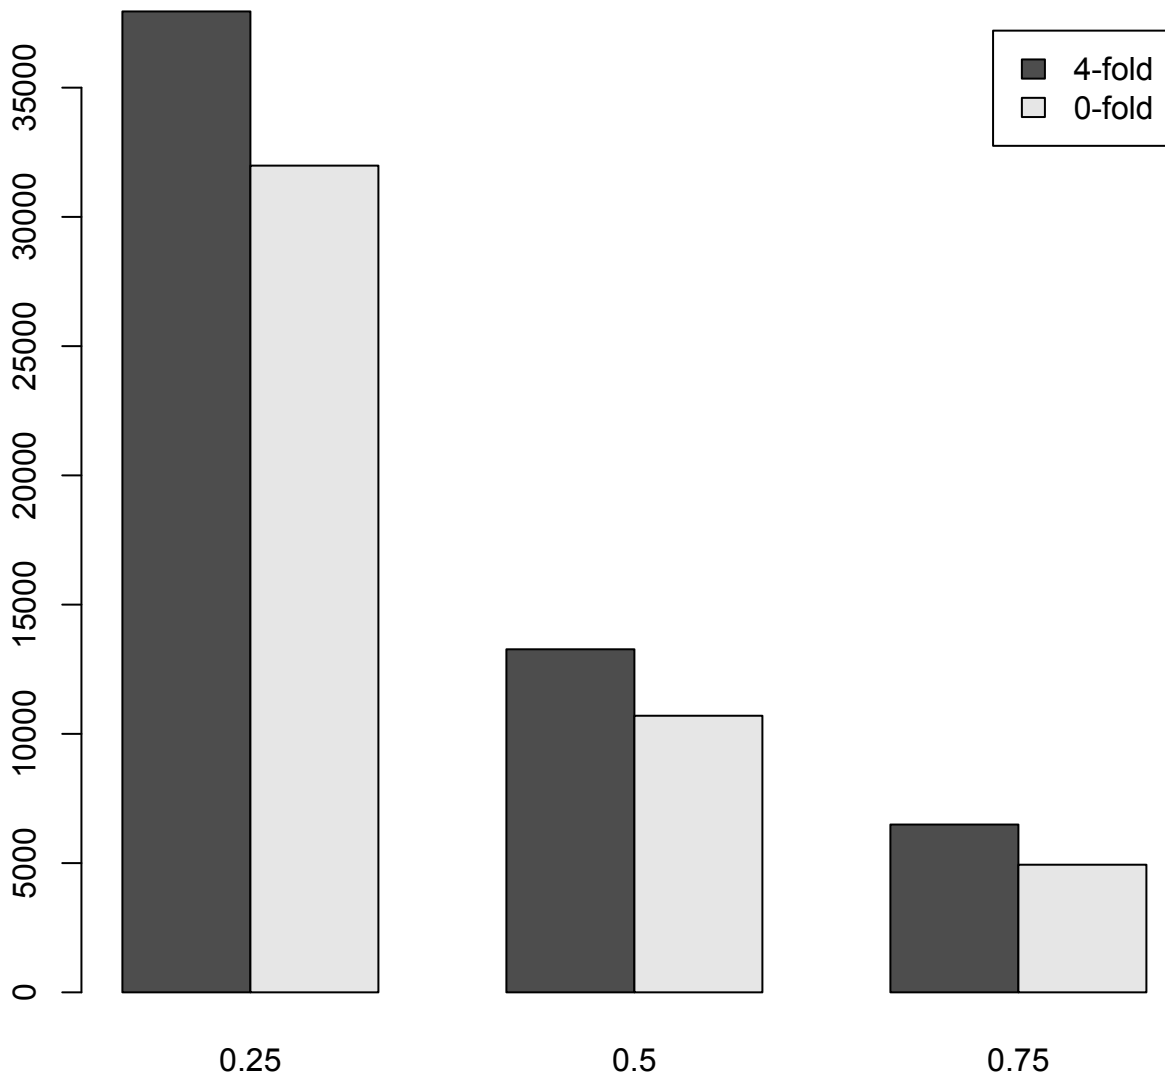

Supplement: Supplementary file 7 [file 1]

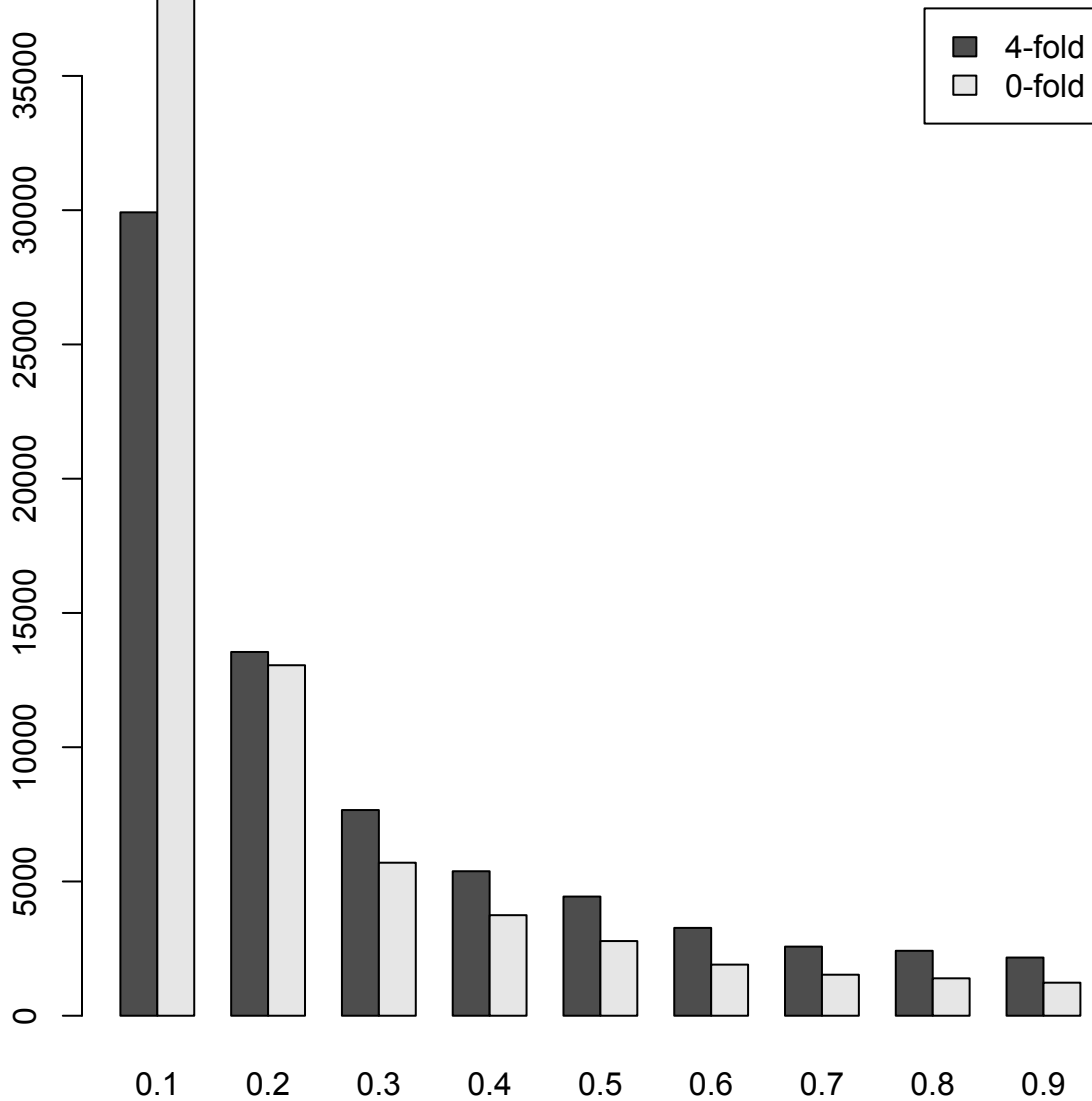

Supplement: Supplementary file 8 [file 1]

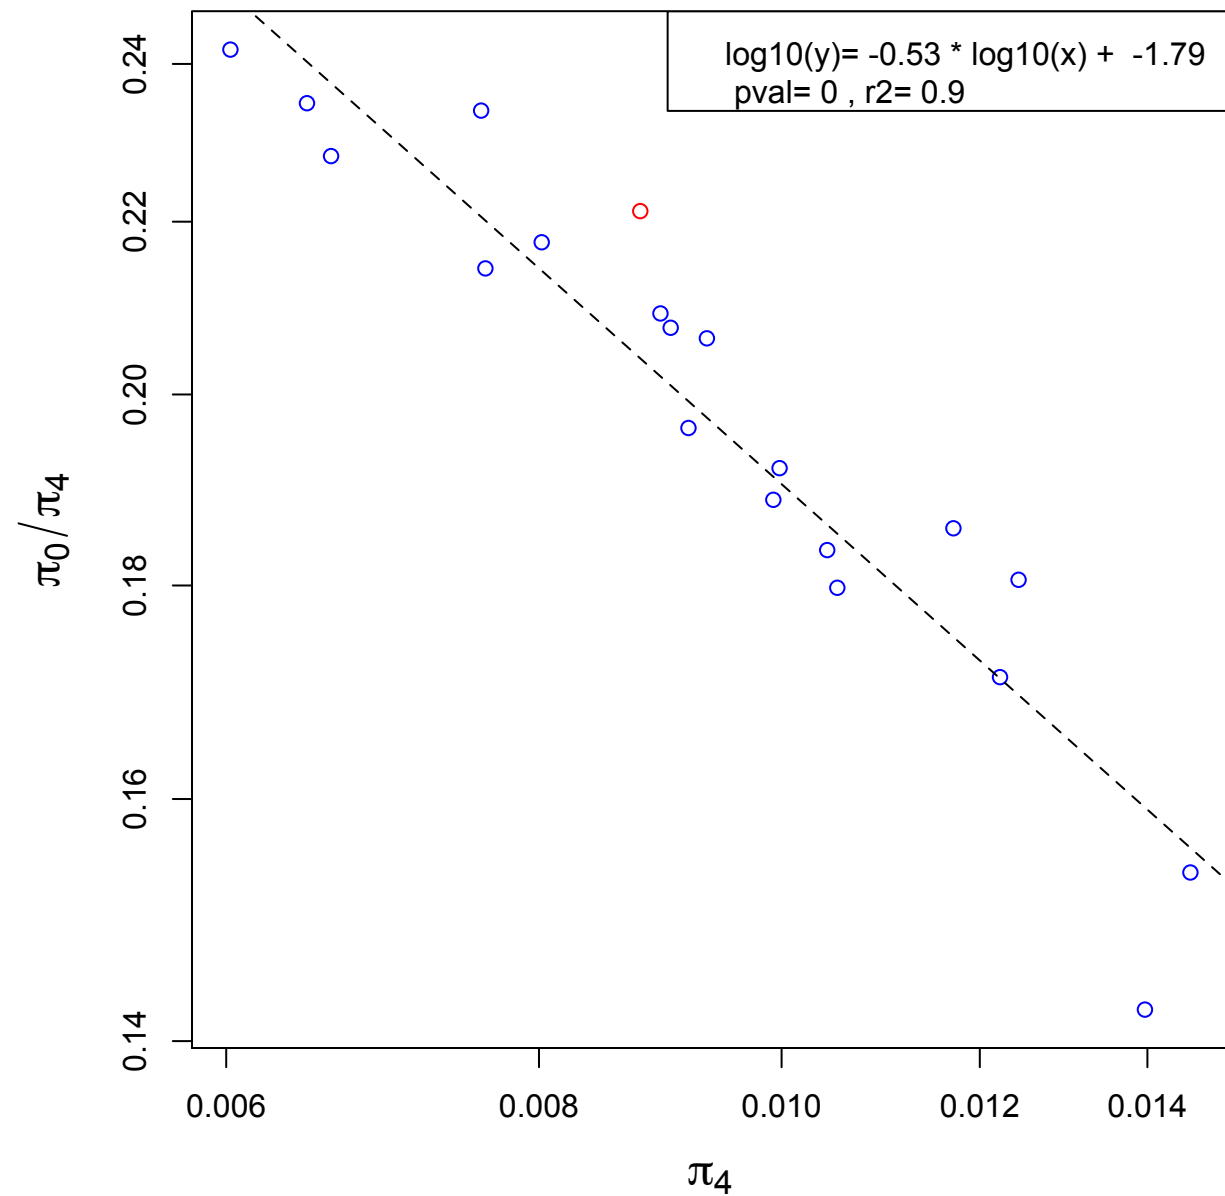

Supplement: Supplementary file 11 [file 1]

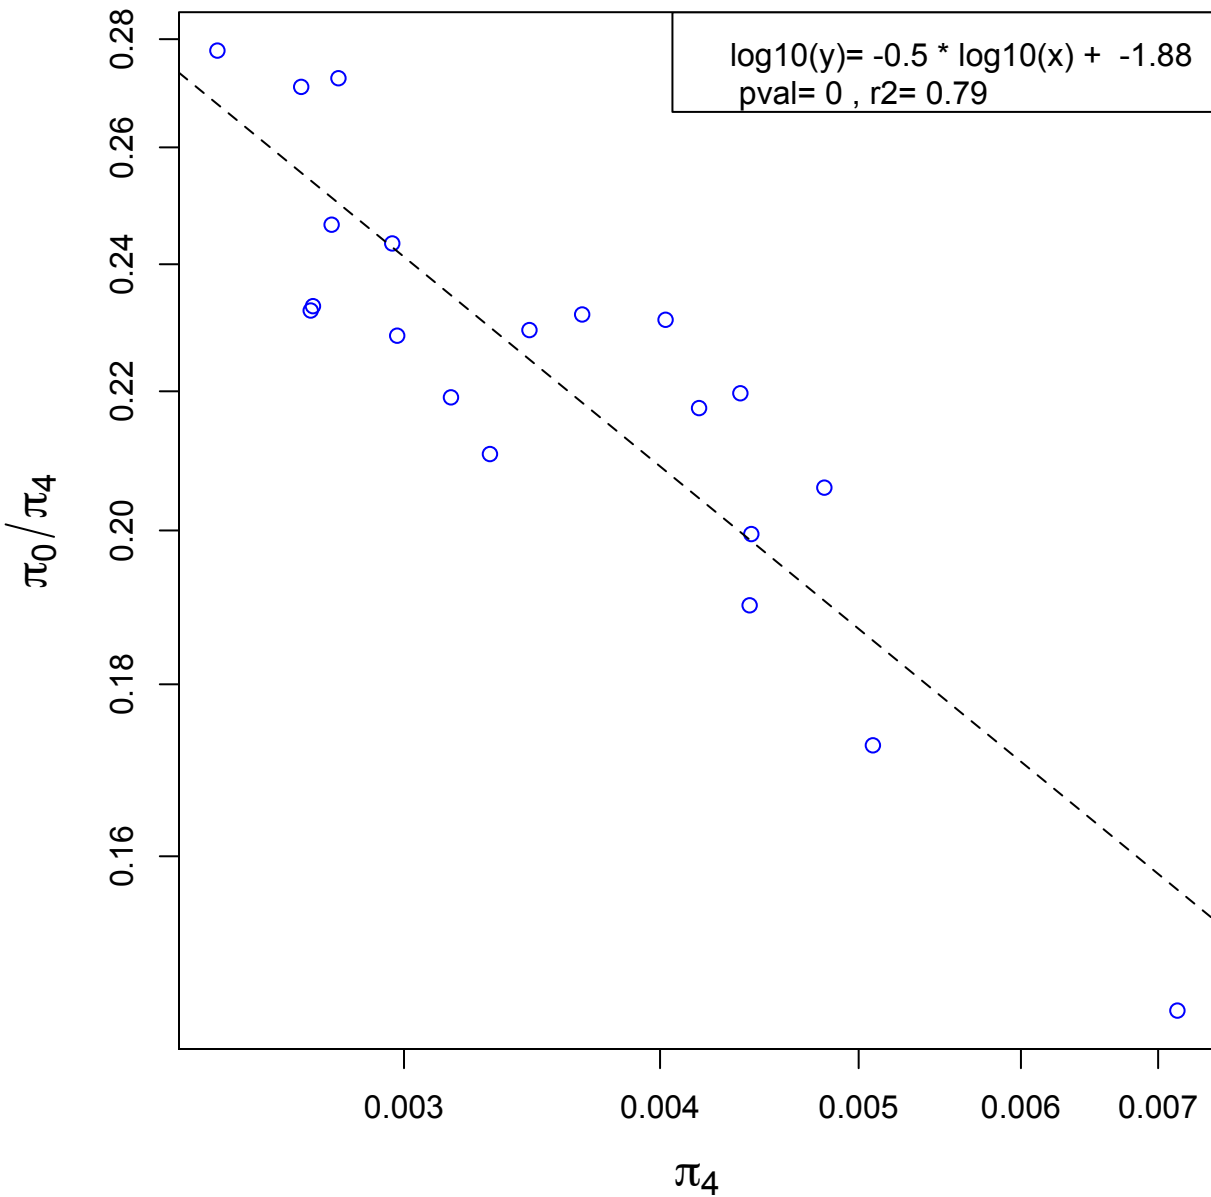

Supplement: Supplementary file 13 [file 1]

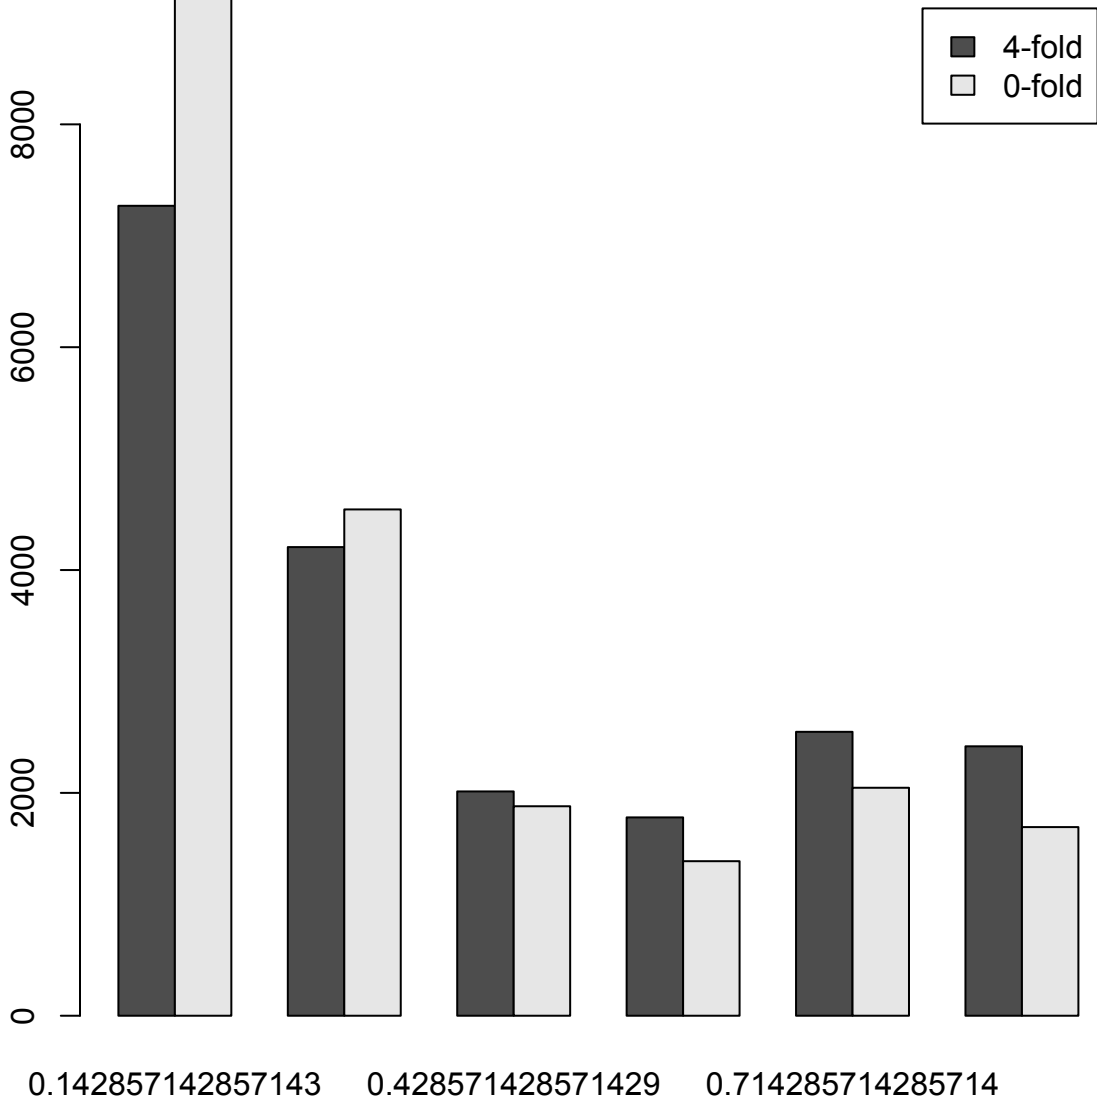

Supplement: Supplementary file 15 [file 1]

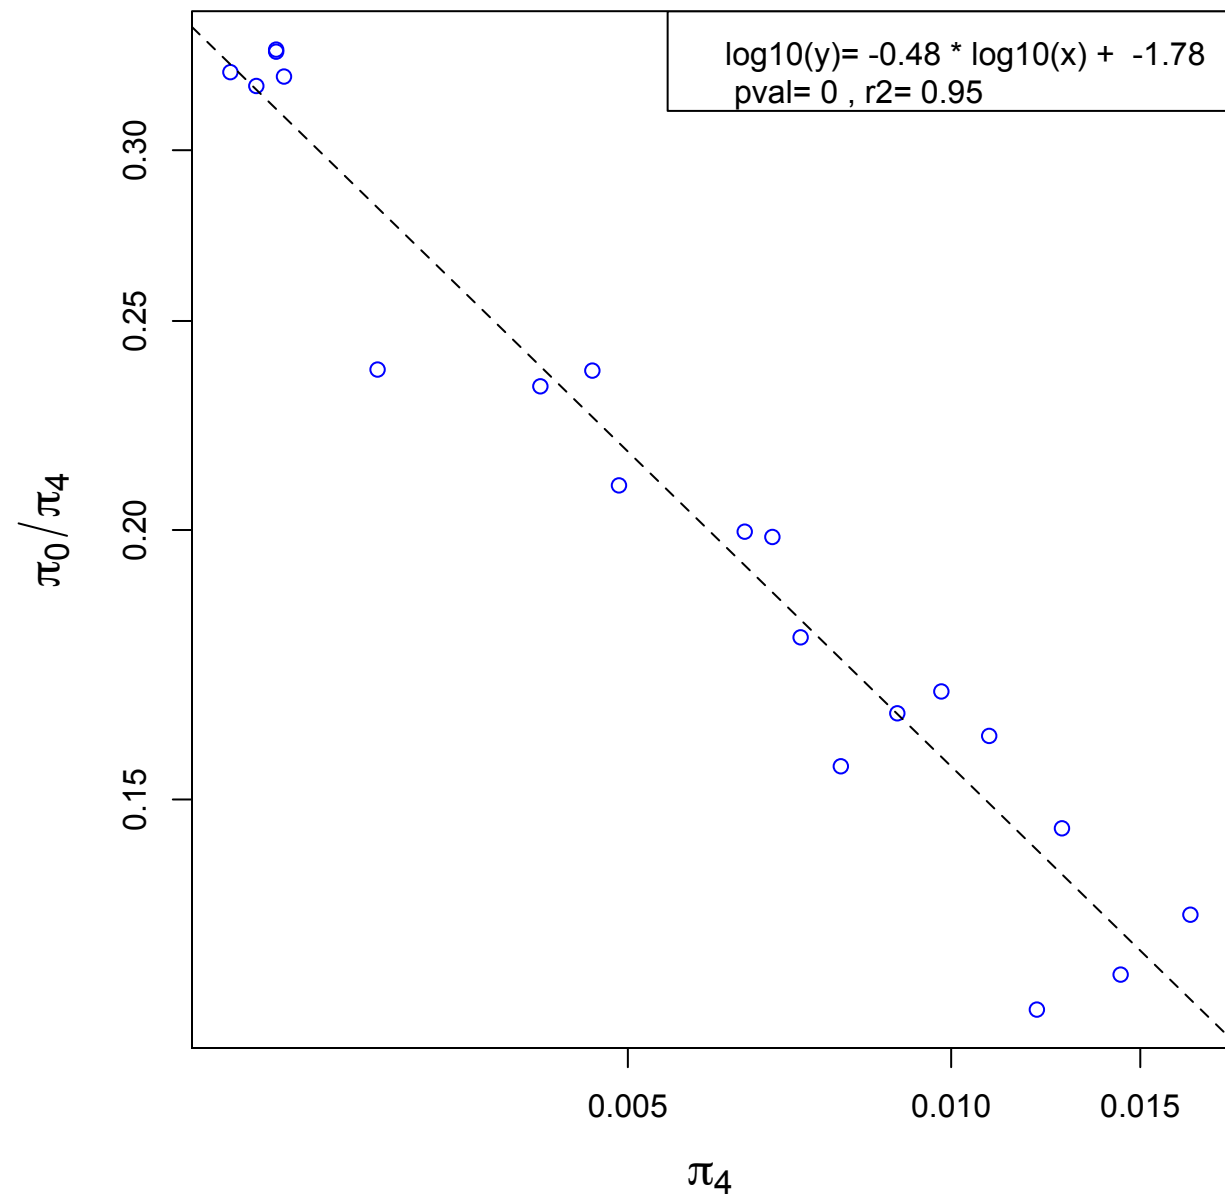

Supplement: Supplementary file 17 [file 1]

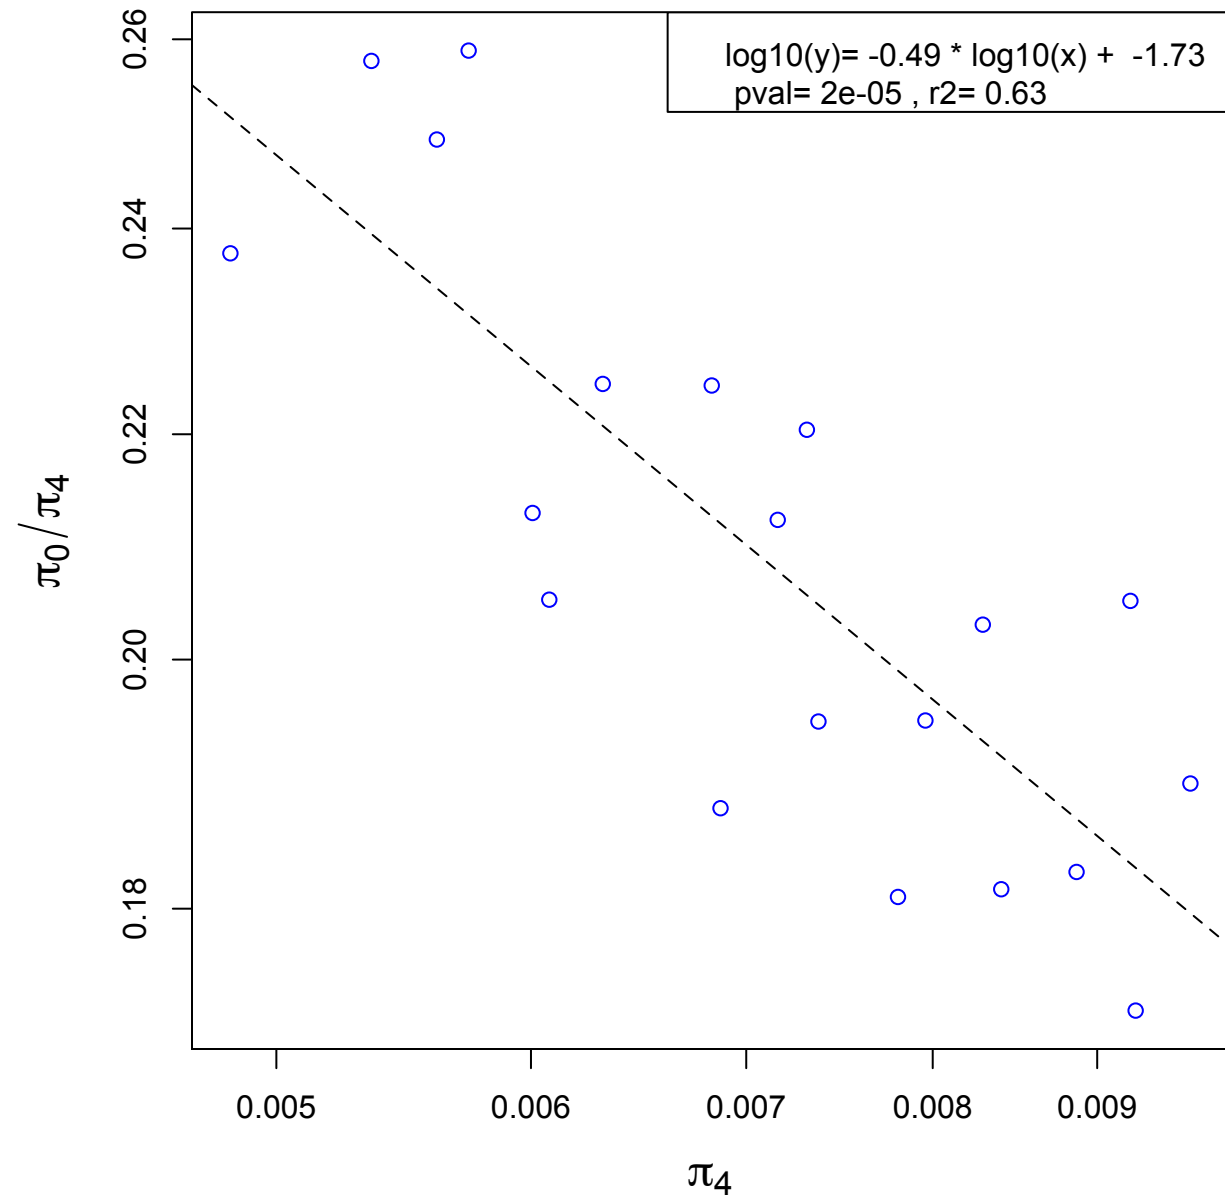

Supplement: Supplementary file 18 [file 1]

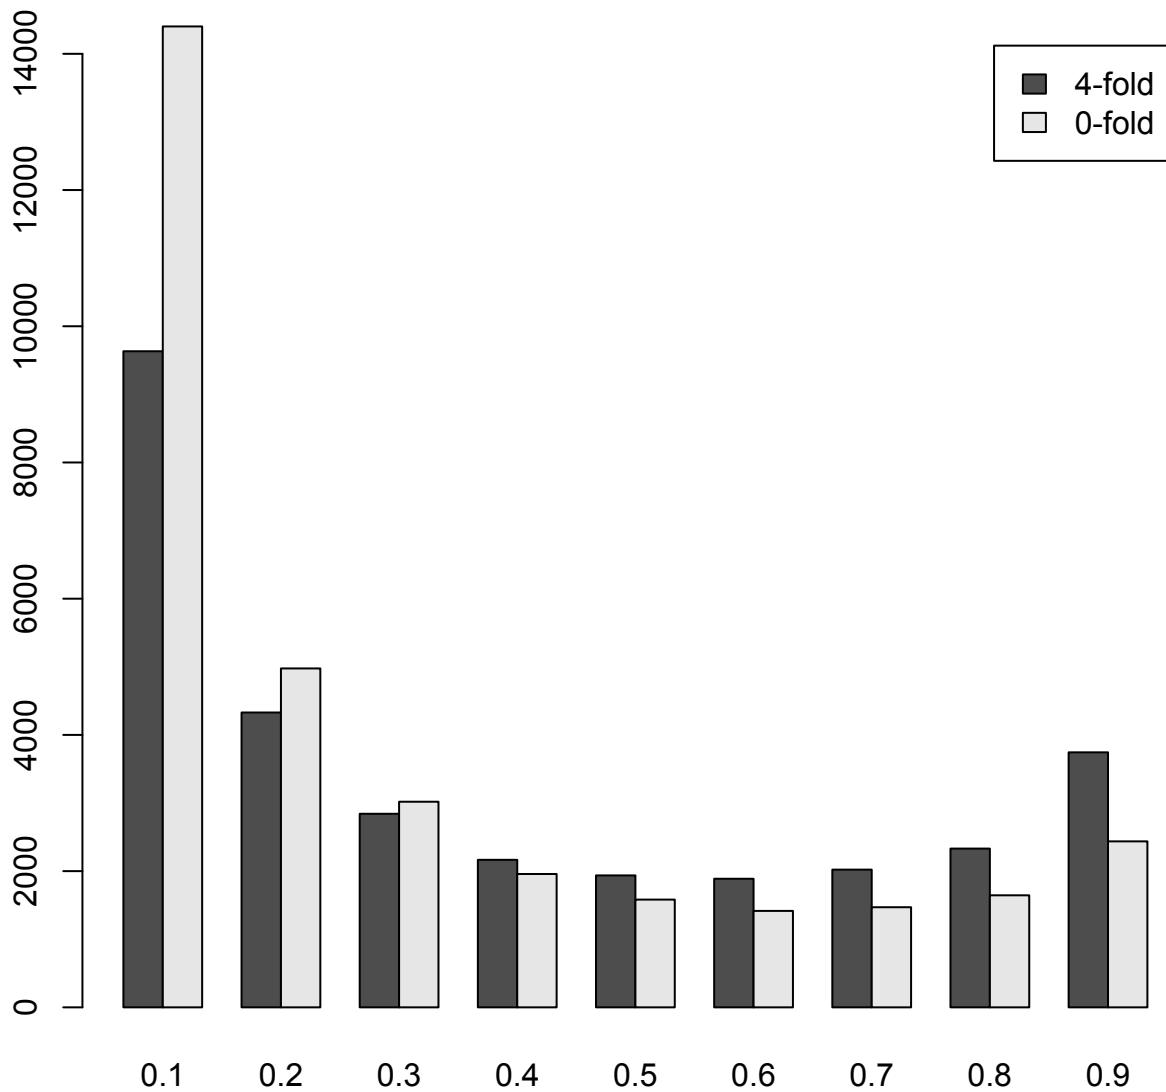

Supplement: Supplementary file 20 [file 1]

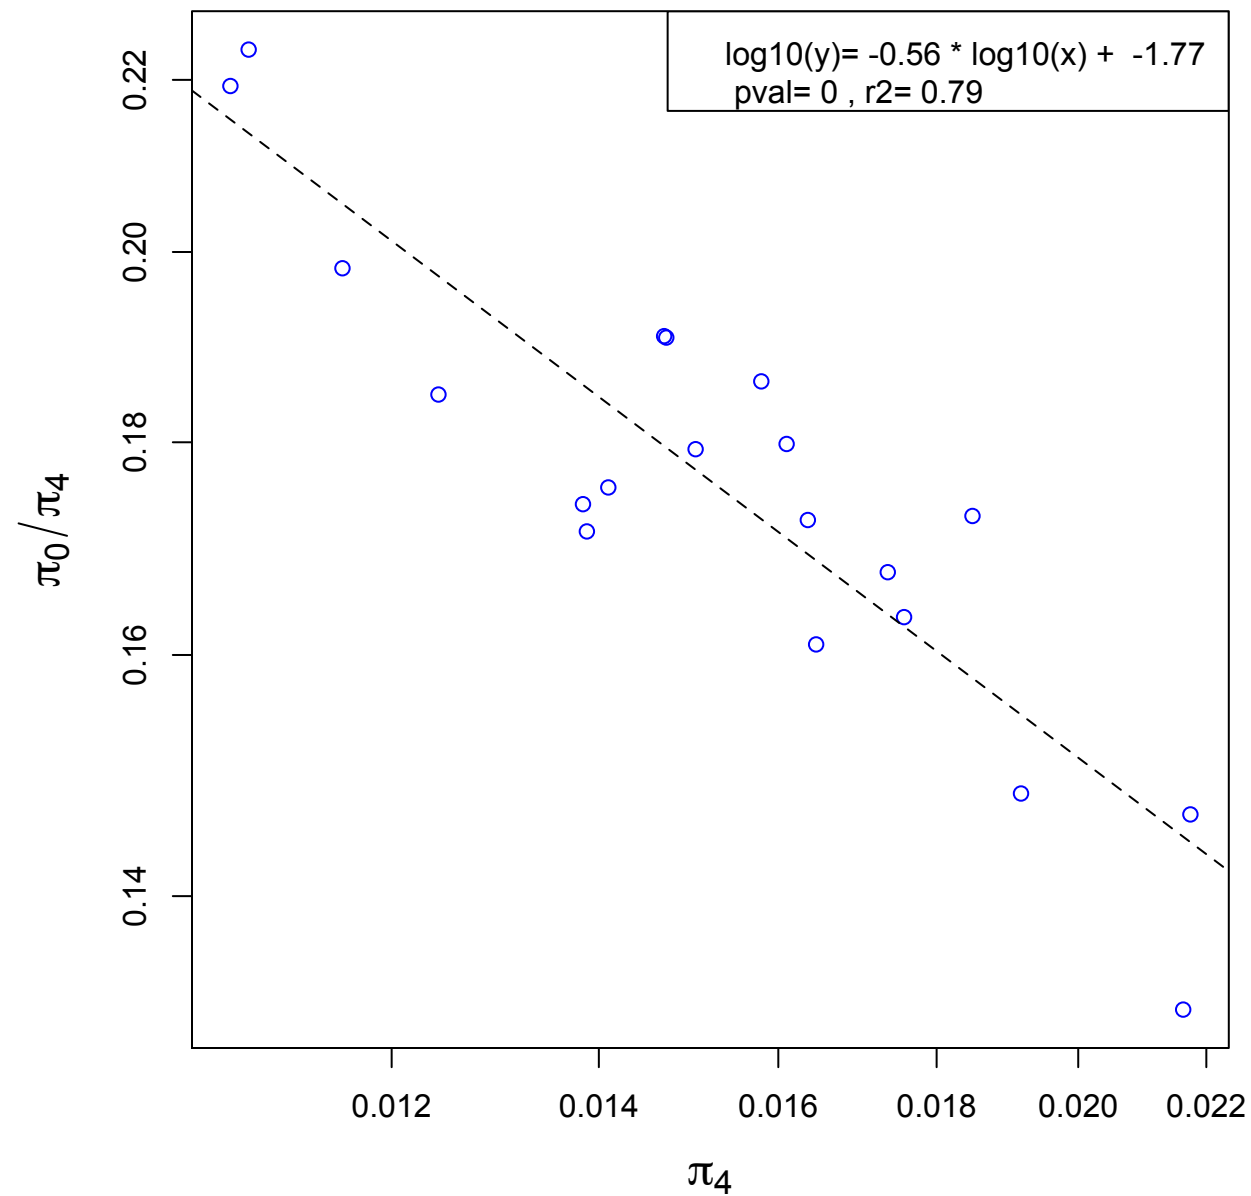

Supplement: Supplementary file 21 [file 1]

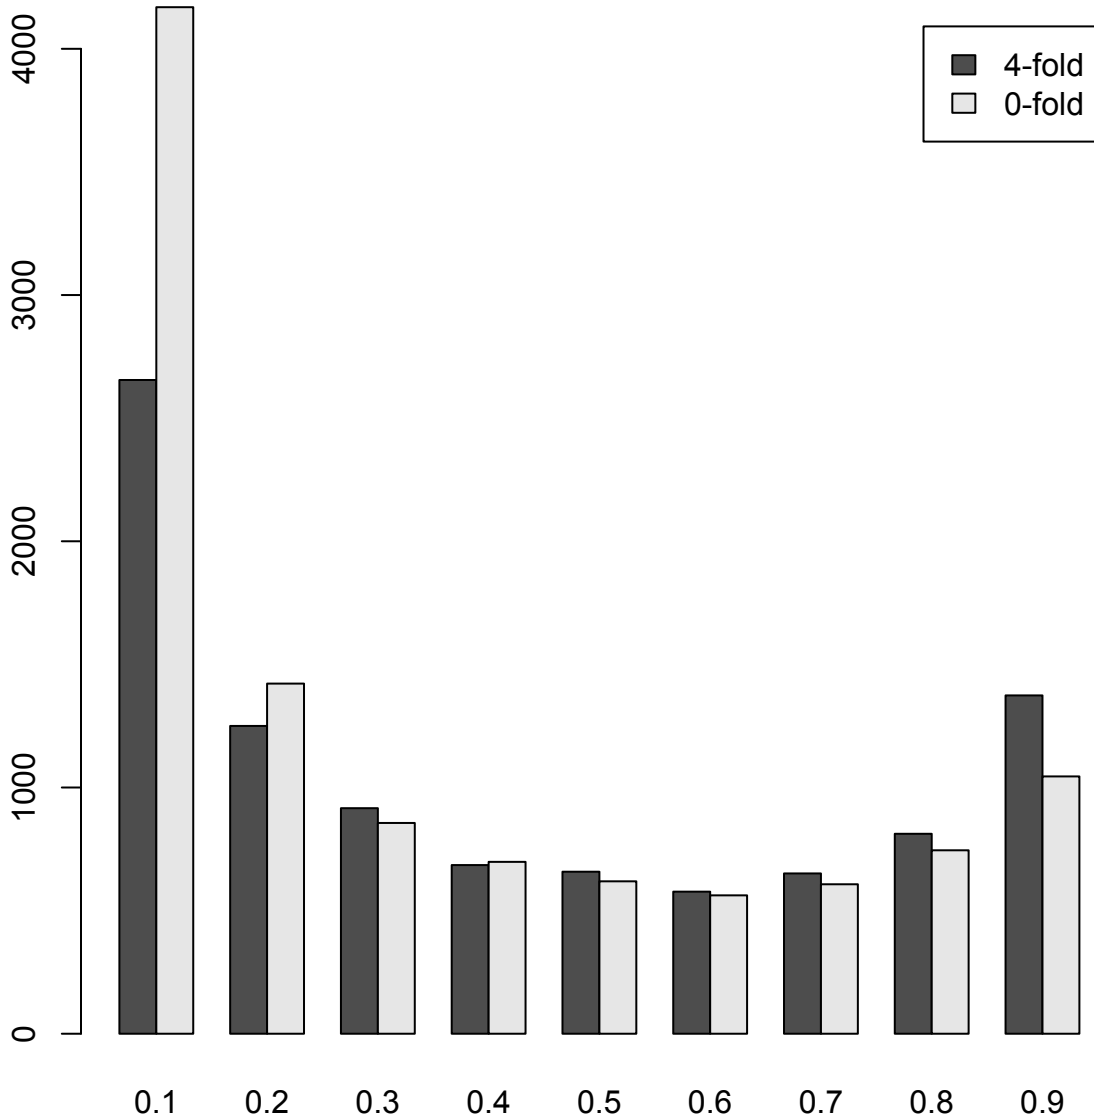

Supplement: Supplementary file 22 [file 1]

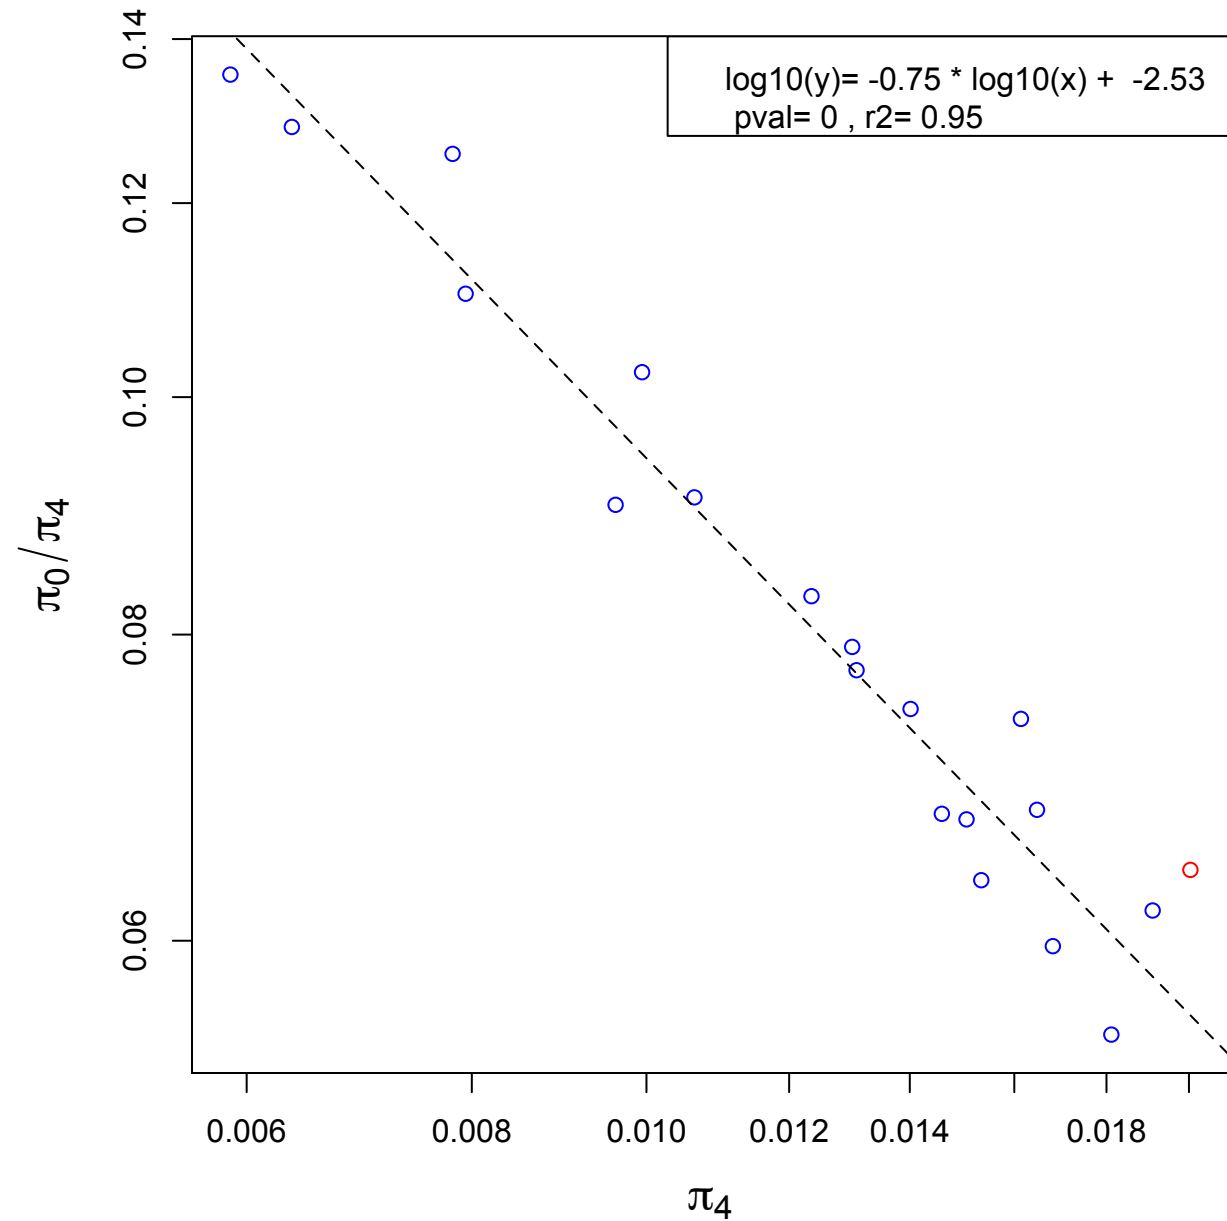

Supplement: Supplementary file 23 [file 1]

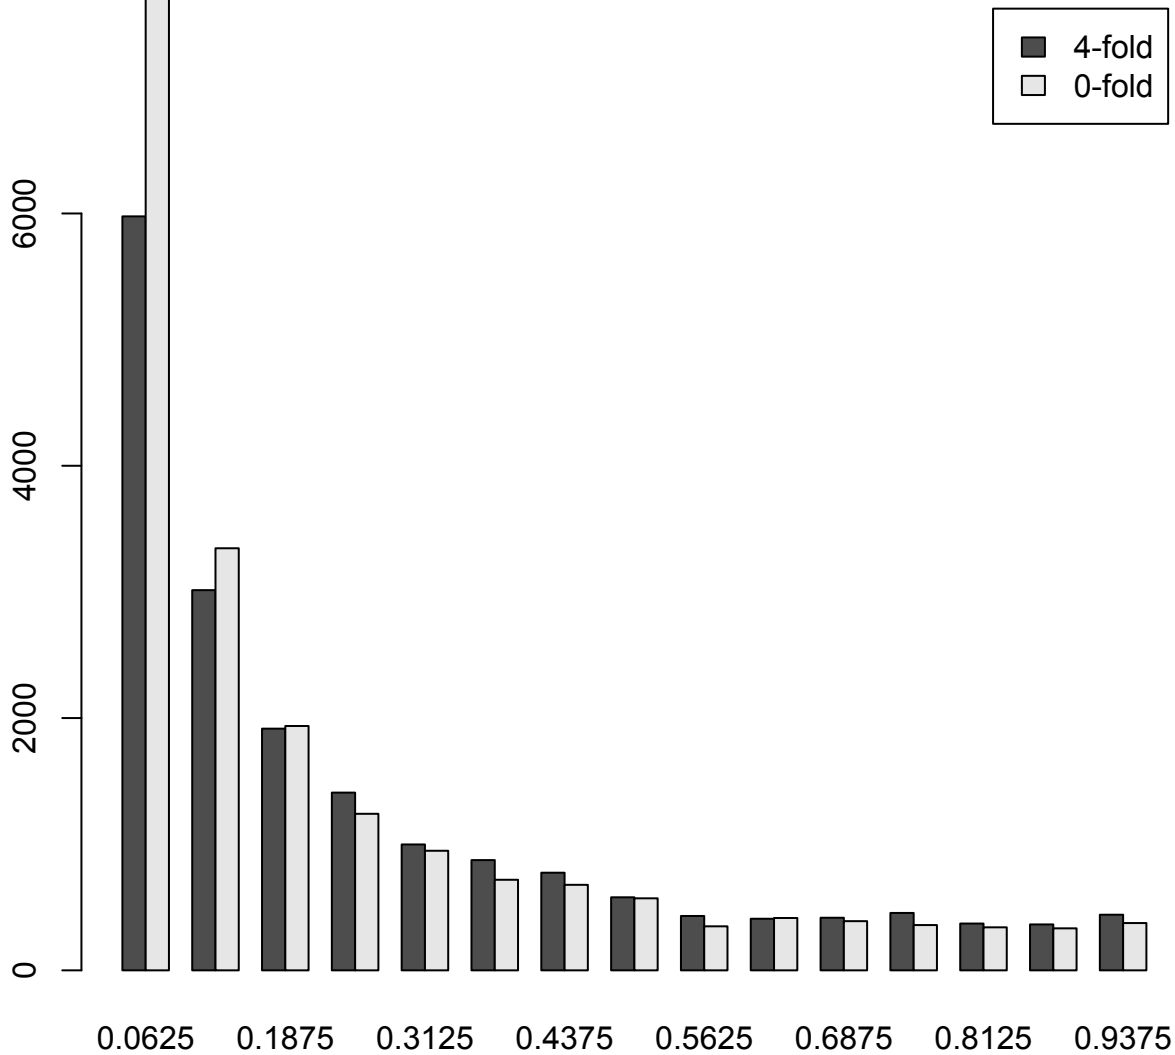

Supplement: Supplementary file 24 [file 1]

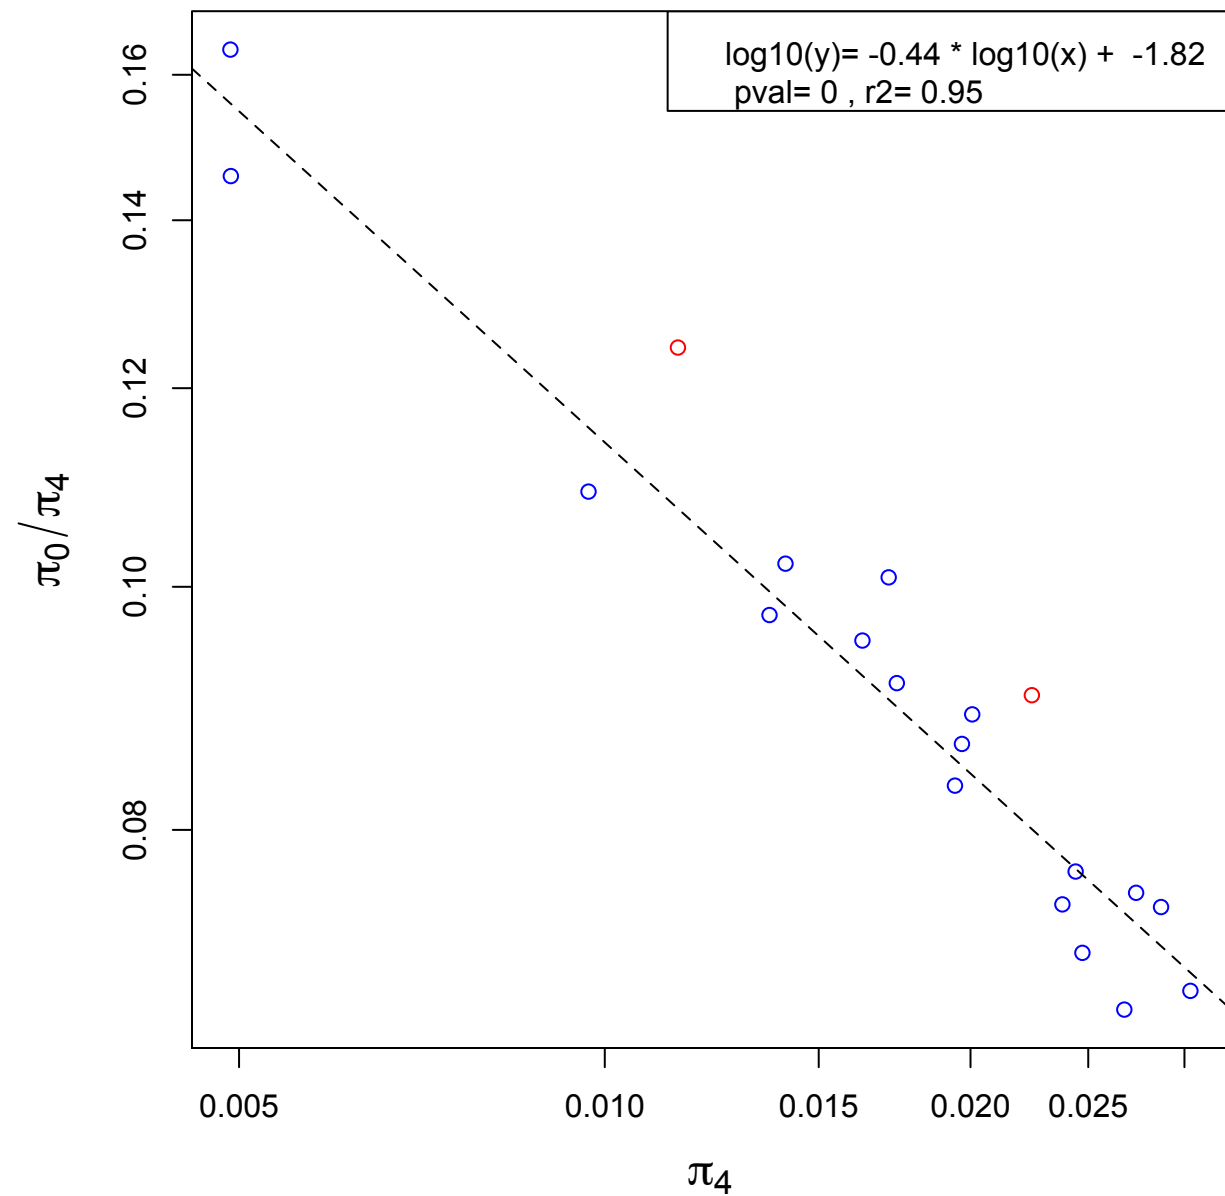

Supplement: Supplementary file 25 [file 1]

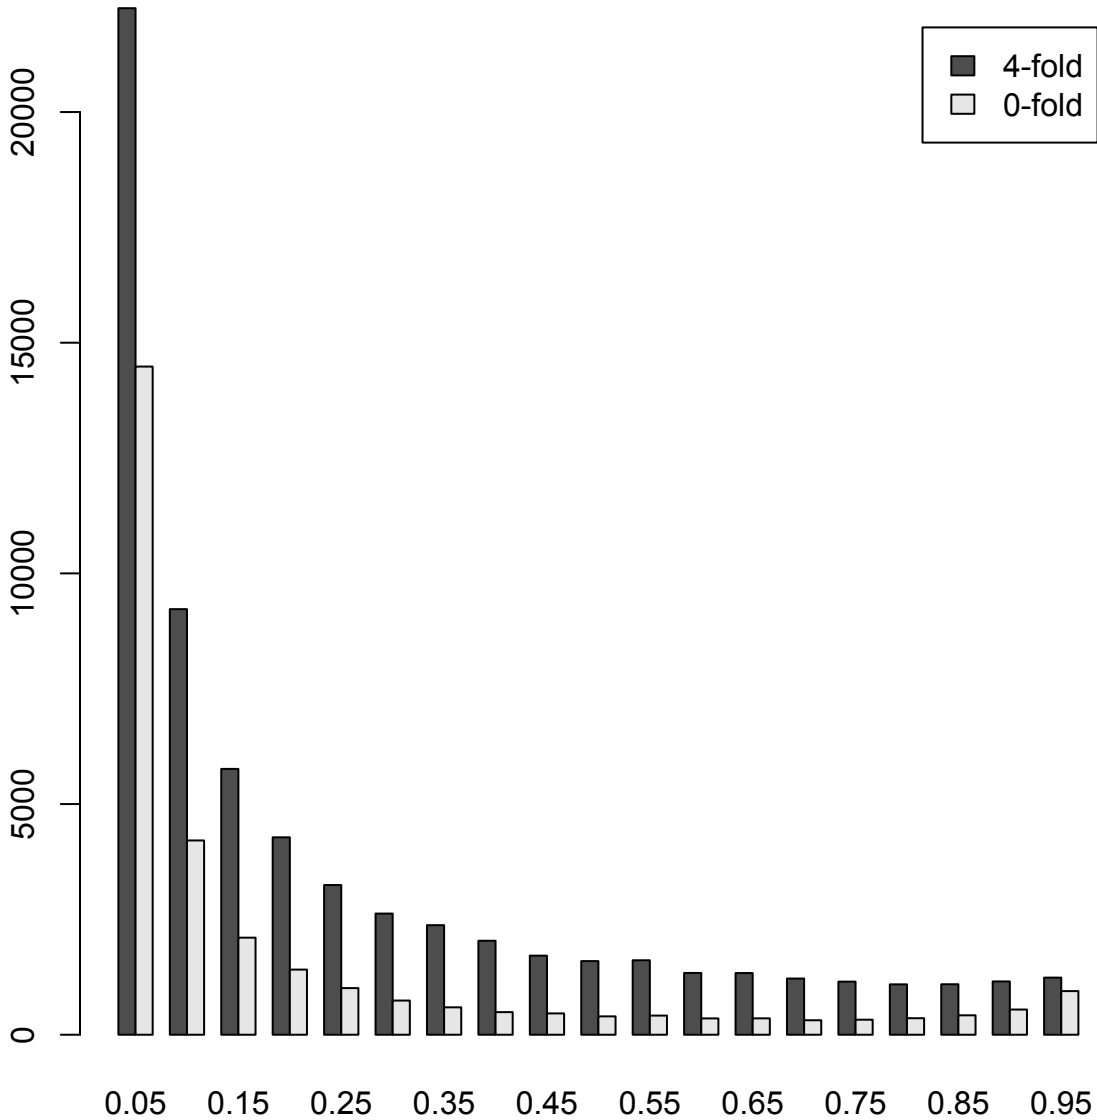

Supplement: Supplementary file 26 [file 1]
